# Supplementary material
Source: publisher figshare collection journal article supplement (https://future-science-group.figshare.com/ndownloader/files/28089564)
Supplement: Supplementary file 1 [file 28089564]

**Supplementary Figure 6**. Univariate analyses of overall survival.


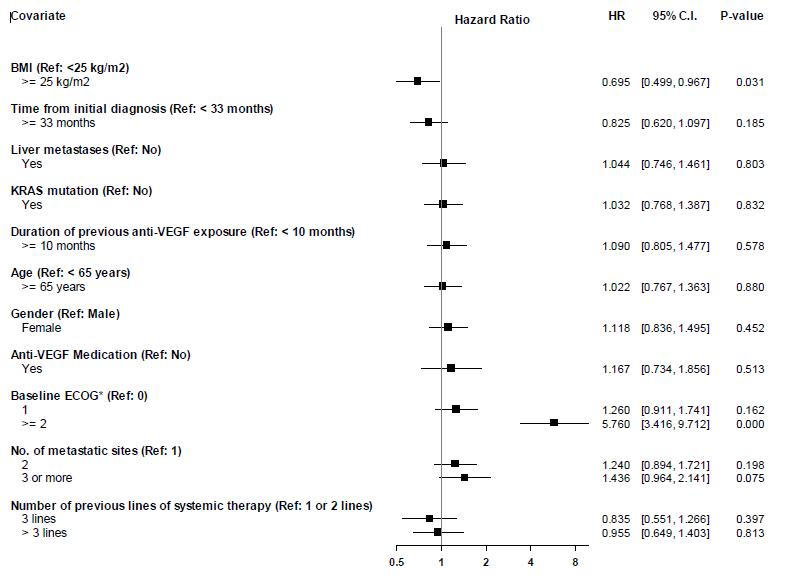


* Met criteria for inclusion in multivariate stepwise procedure.
